# Supplementary material
Source: PubMed Central journal article supplement (PMC3272352)

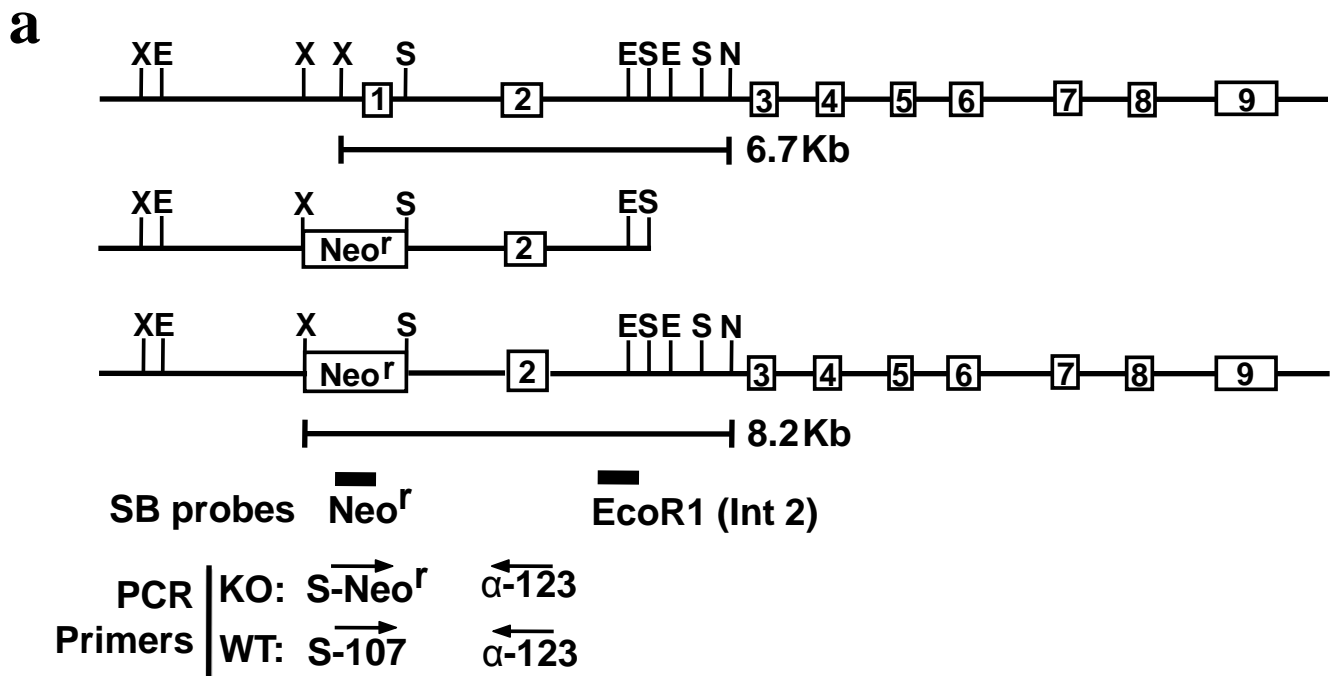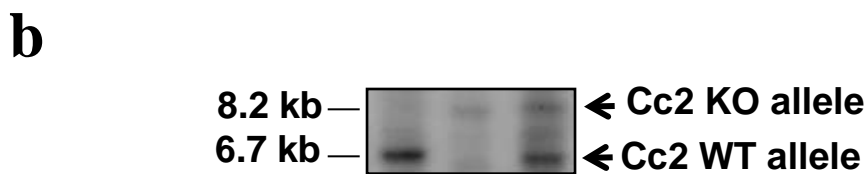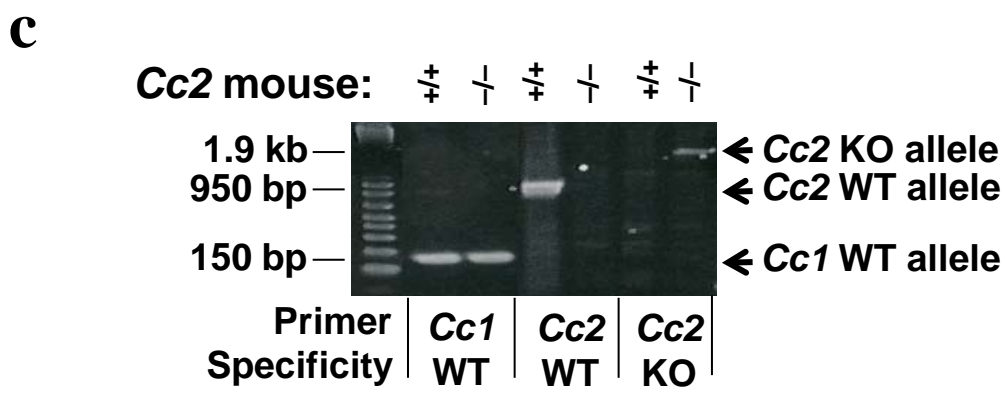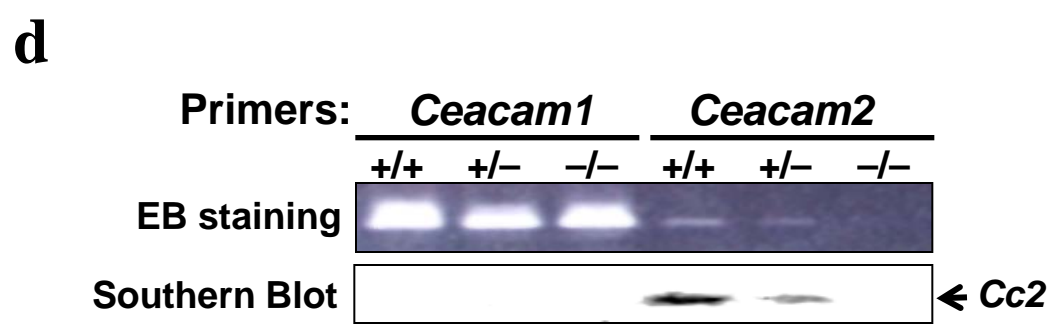

Supplement: NIHMS344642-supplement-1.pdf [file NIHMS344642-supplement-1.pdf]
